# Supplementary material for: A comparison of the oxidation of lignin model compounds in conventional and ionic liquid solvents and application to the oxidation of lignin
Source: Royal Society of Chemistry journal article supplement (doi:10.1039/c6ra18806k), 2016-01-01

Supporting information for

**Lignin deconstruction by oxidation: model studies in conventional and ionic liquid solvents**

Soledad G. Yao,<sup>a</sup> Mark S. Meier,<sup>\*,a</sup>  
Robert Pace<sup>b</sup> and Mark Crocker,<sup>a,b</sup>

<sup>a</sup>*Department of Chemistry, University of Kentucky, Lexington, KY 40506, USA*

<sup>b</sup>*Center for Applied Energy Research, Lexington, KY 40511, USA*

**NMR Spectra**

|                                                     |          |
|-----------------------------------------------------|----------|
| 1. Compound <b>1</b> .....                          | page S2  |
| 2. Compound <b>2</b> .....                          | page S3  |
| 3. Compound <b>3</b> .....                          | page S4  |
| 4. Compound <b>4</b> .....                          | page S5  |
| 5. Compound <b>5</b> .....                          | page S6  |
| 6. Compound <b>8</b> .....                          | page S7  |
| 7. Compound <b>9</b> .....                          | page S8  |
| 8. Compound <b>10</b> .....                         | page S9  |
| 9. Compound <b>11</b> .....                         | page S10 |
| 10. Compound <b>12</b> .....                        | page S11 |
| 11. Compound <b>21</b> .....                        | page S12 |
| 12. Compound <b>22</b> .....                        | page S13 |
| 13. Kraft lignin .....                              | page S14 |
| 14. Kraft lignin post-oxidation in MeCN.....        | page S14 |
| 15. Kraft lignin post-oxidation in [C4C1im]Cl ..... | page S15 |
| 16. Kraft lignin post-oxidation in [P4444]Cl .....  | page S15 |

**KBr-FTIR Spectra**

|                                                     |          |
|-----------------------------------------------------|----------|
| 17. Kraft lignin .....                              | page S16 |
| 18. Kraft lignin post-oxidation in MeCN.....        | page S16 |
| 19. Kraft lignin post-oxidation in [C4C1im]Cl ..... | page S17 |
| 20. Kraft lignin post-oxidation in [P4444]Cl .....  | page S17 |
| 21. Superimposed Spectra .....                      | page S18 |

# $^1\text{H}$ NMR and $^{13}\text{C}$ NMR spectra of 1

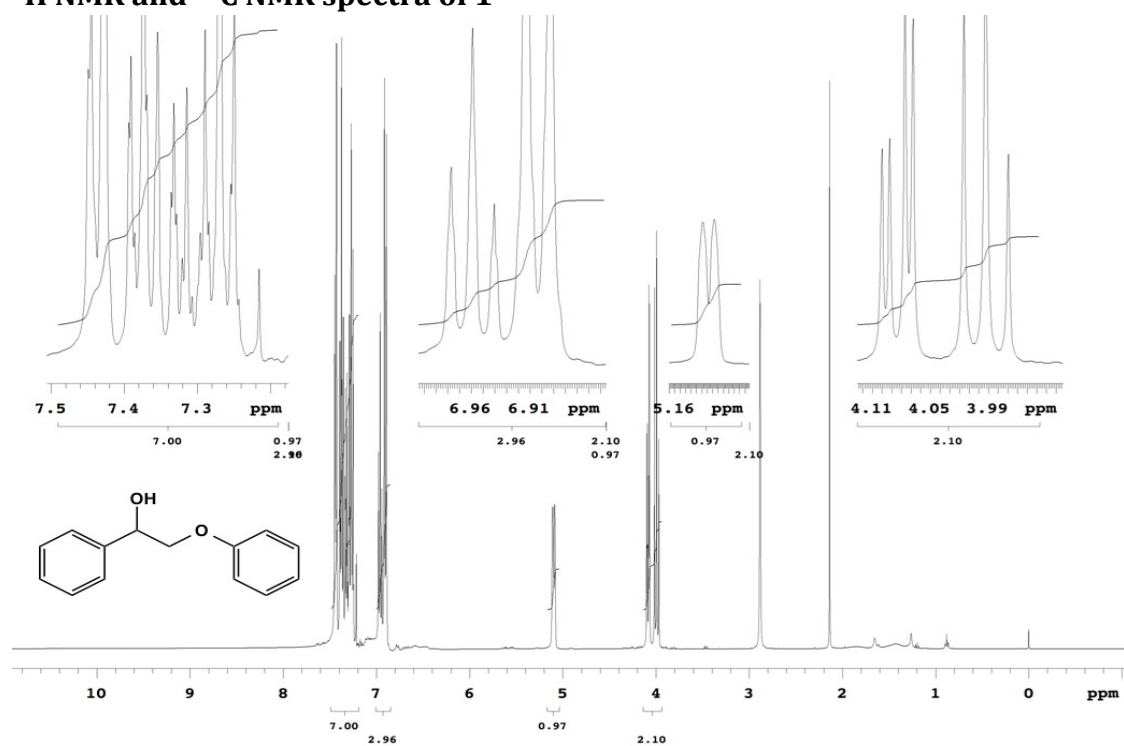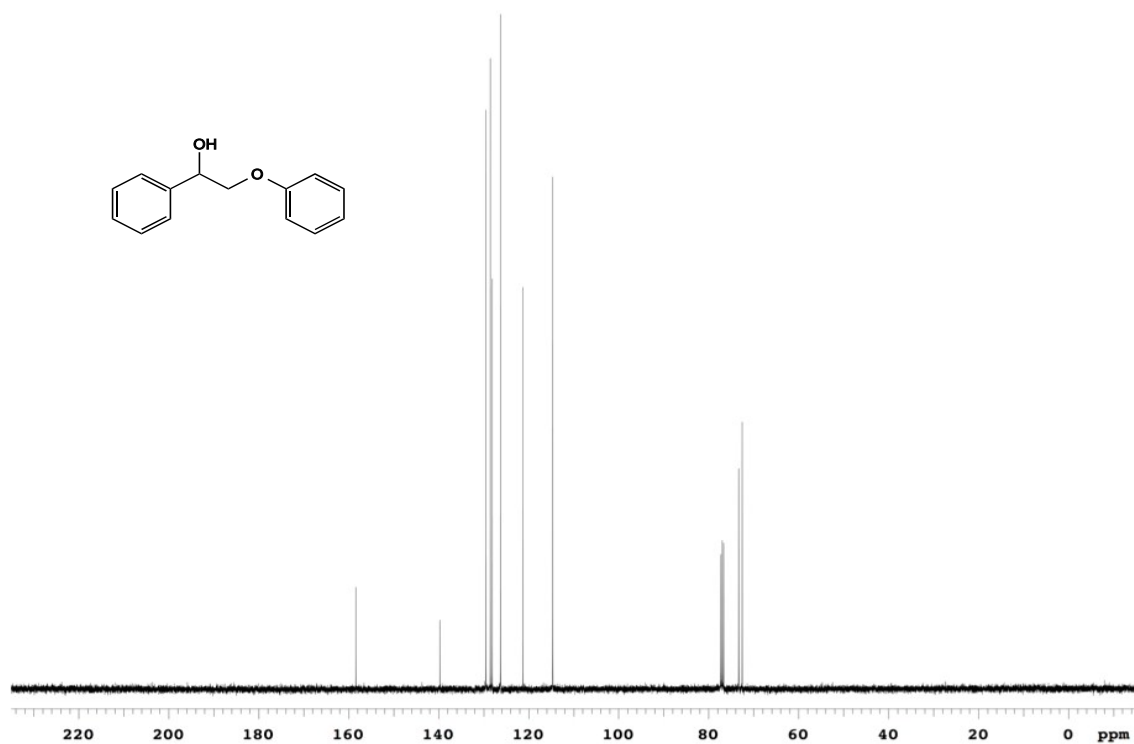

# $^1\text{H}$ NMR and $^{13}\text{C}$ NMR spectra of 2 (mixture of diastereomers)

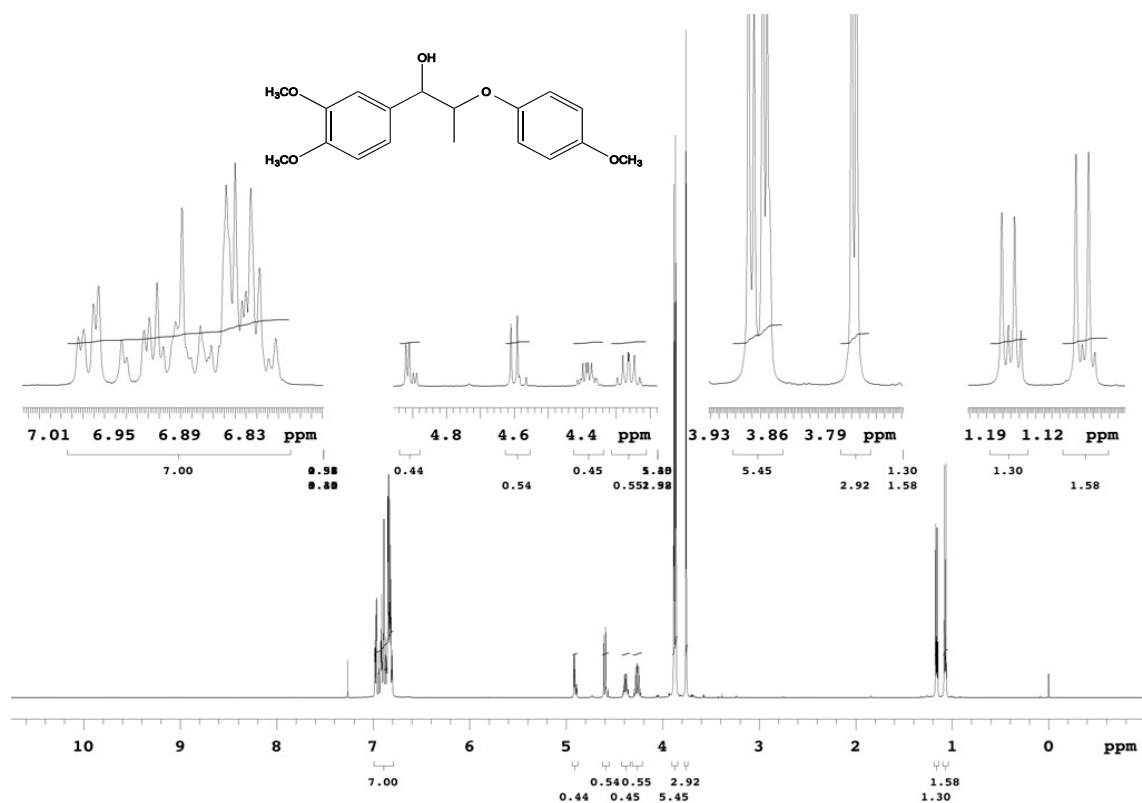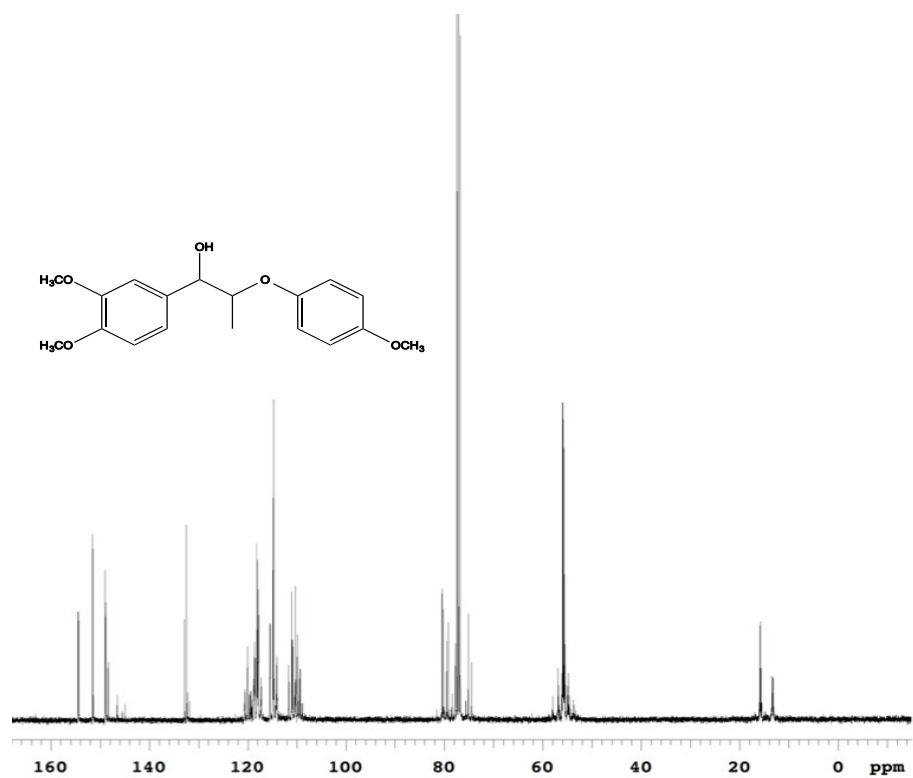

# $^1\text{H}$ NMR and $^{13}\text{C}$ NMR spectra of 3 (mixture of diastereomers)

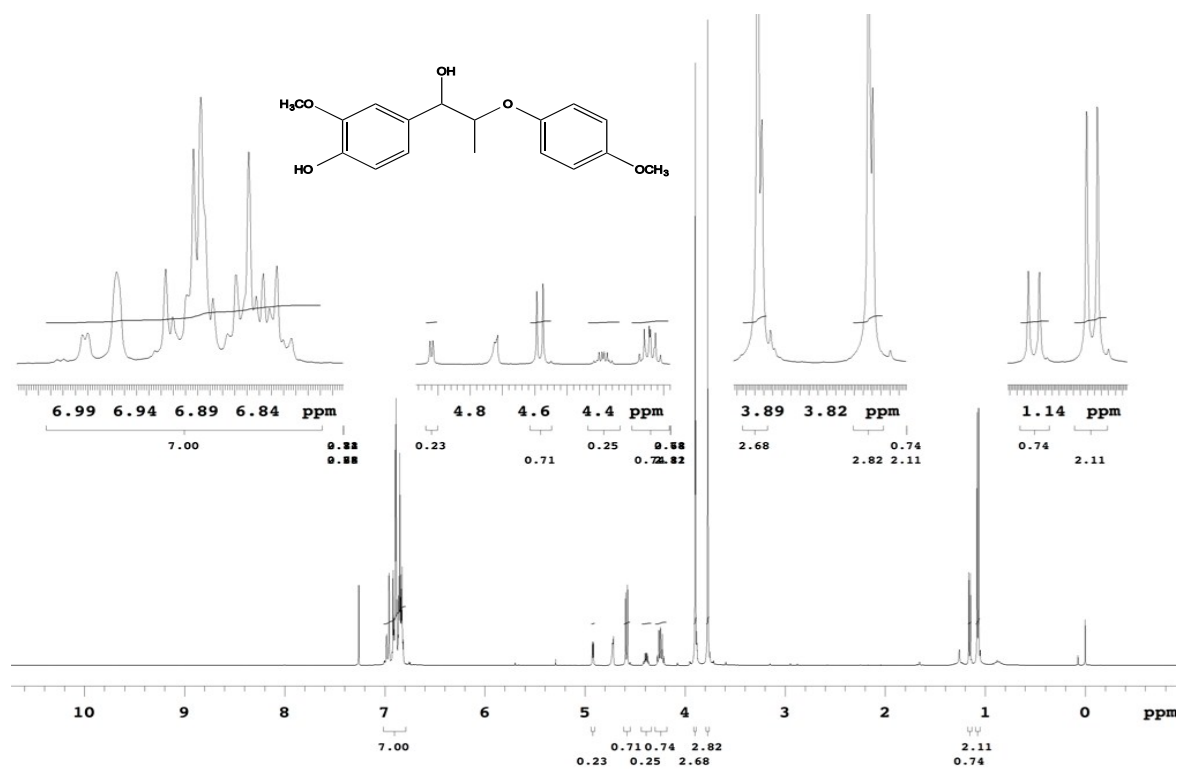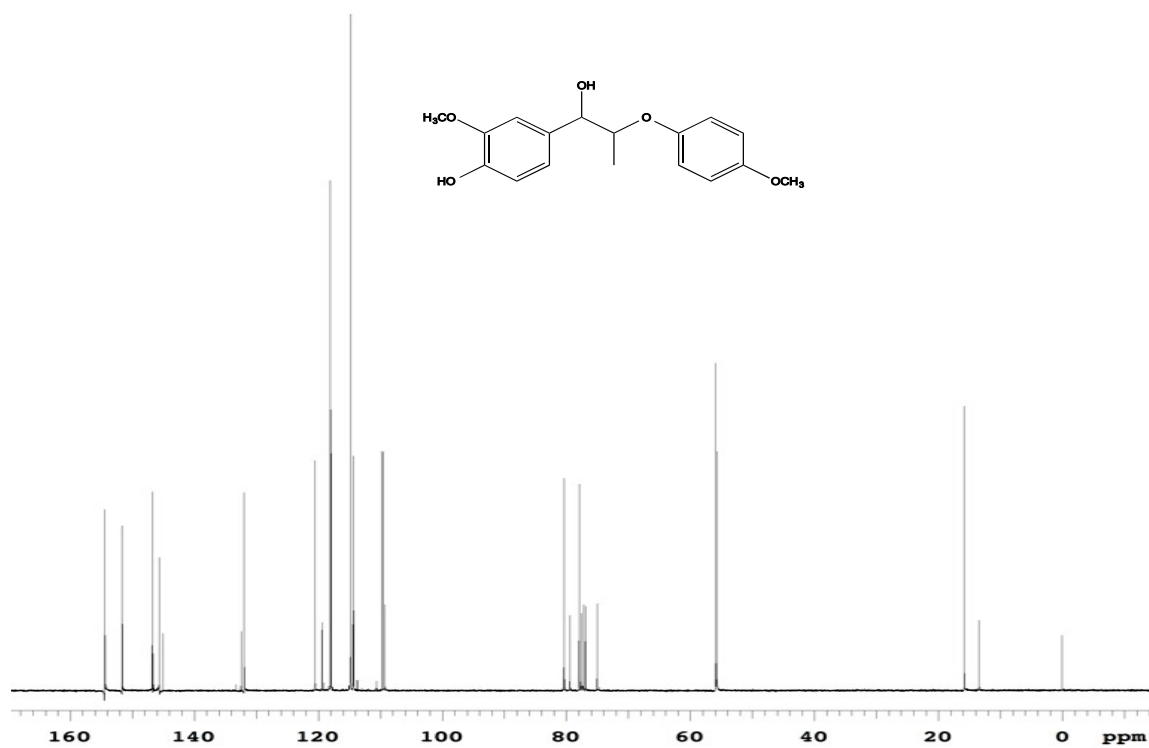

# $^1\text{H}$ NMR and $^{13}\text{C}$ NMR spectra of 4 (mixture of diastereomers)

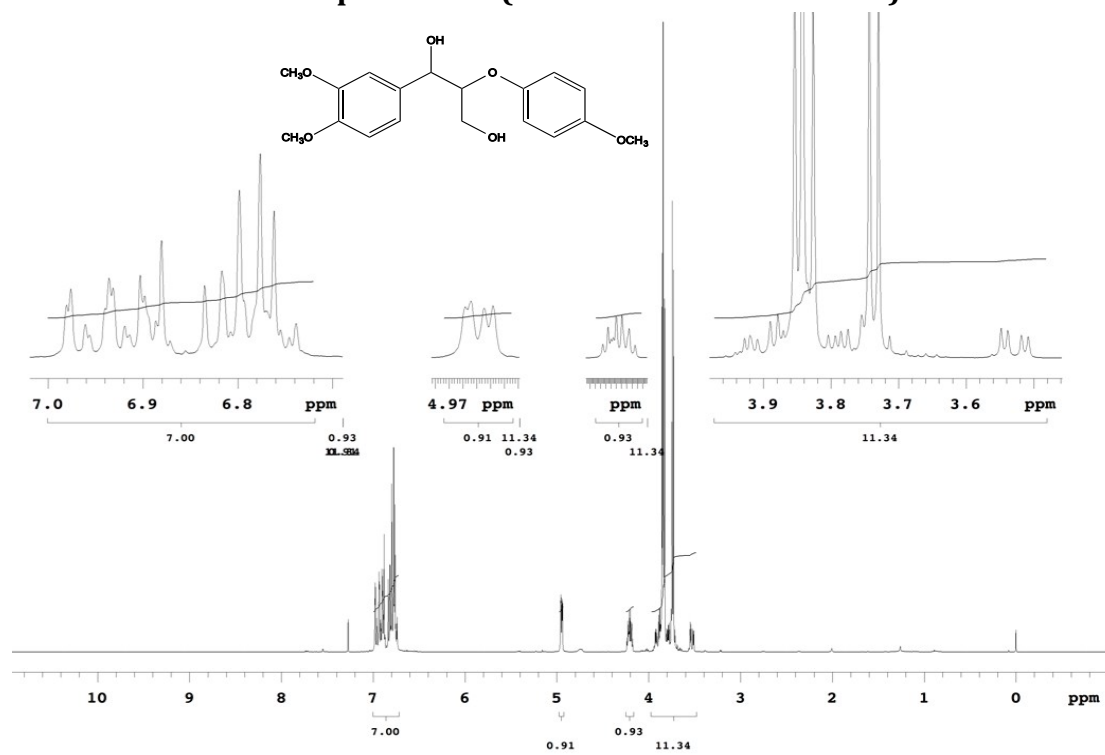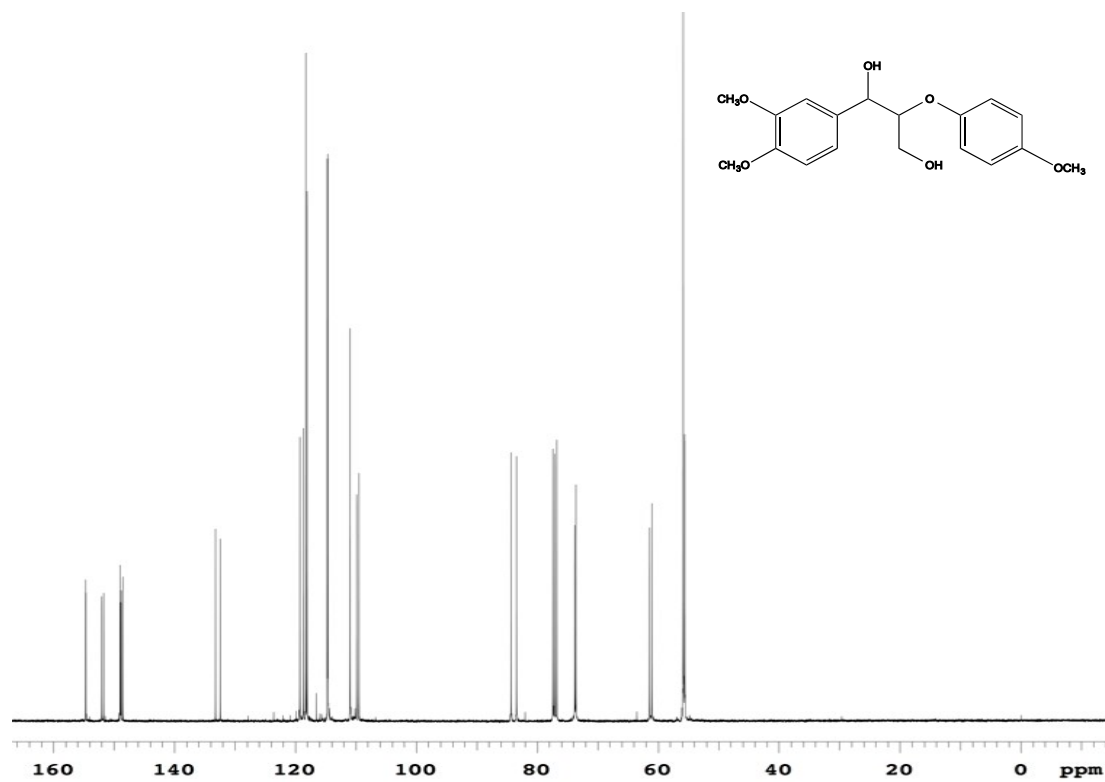

# $^1\text{H}$ NMR and $^{13}\text{C}$ NMR spectra of 5 (mixture of diastereomers)

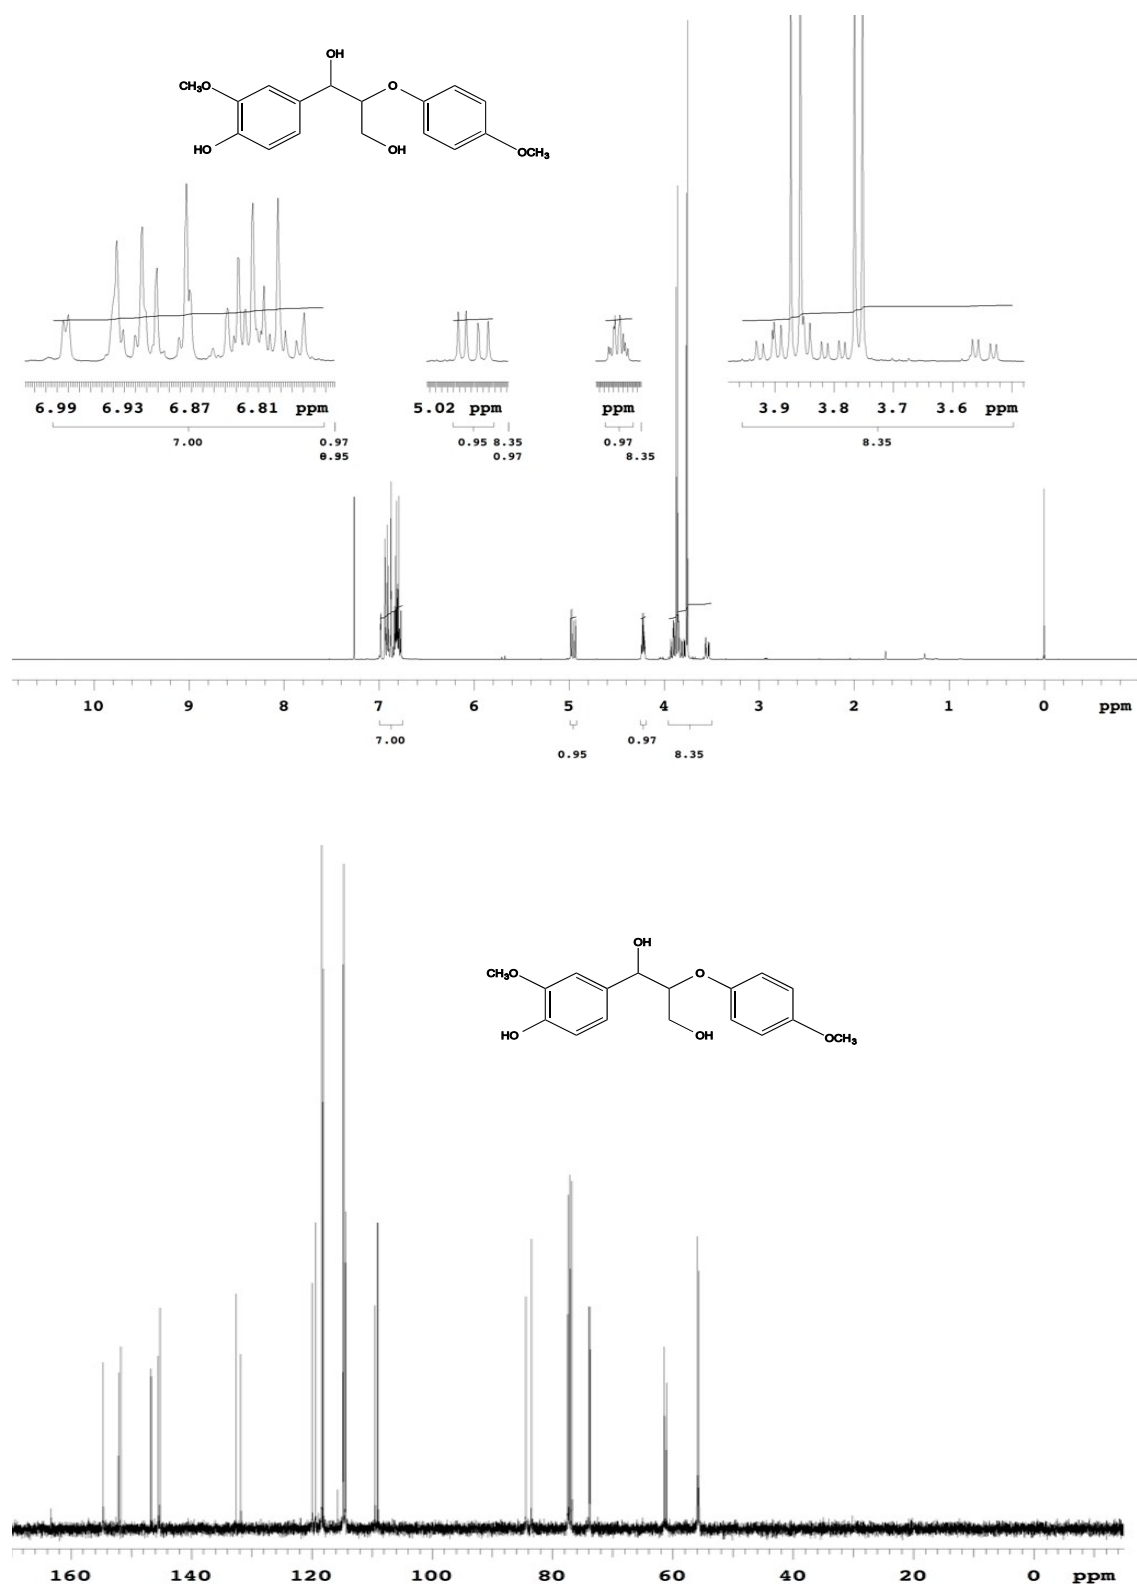

# $^1\text{H}$ NMR and $^{13}\text{C}$ NMR spectra of 8

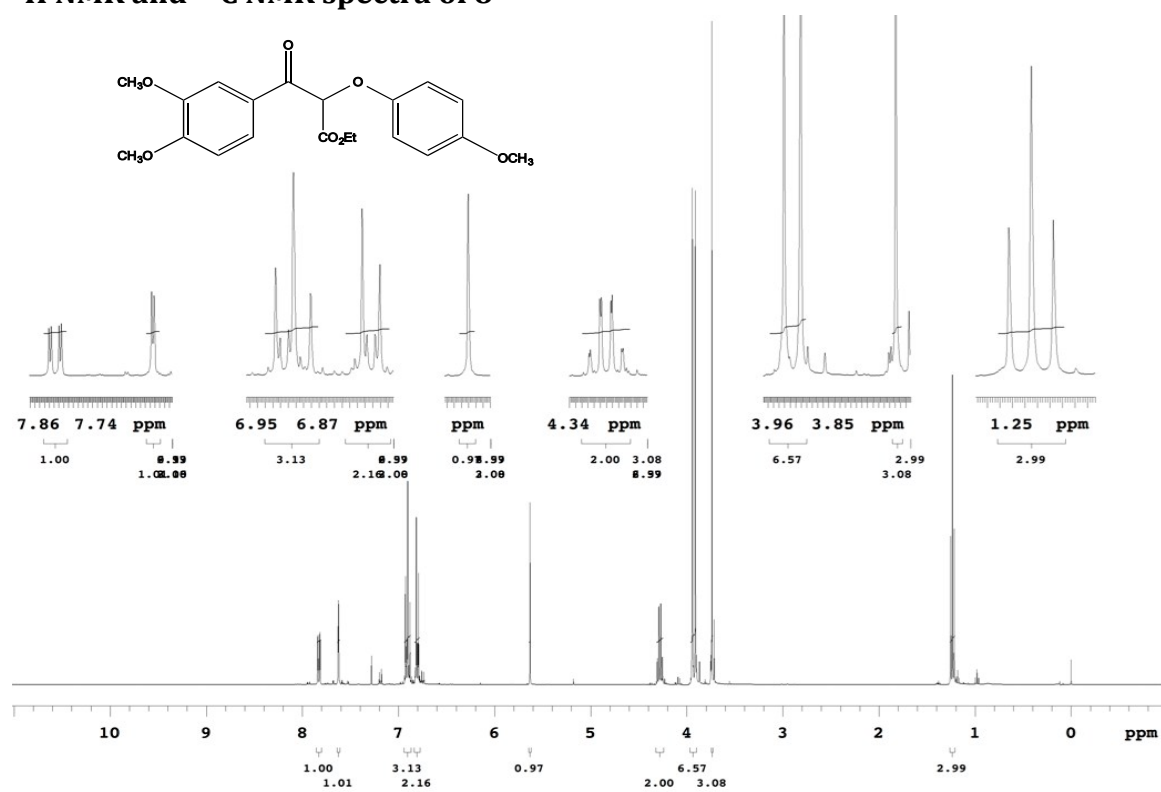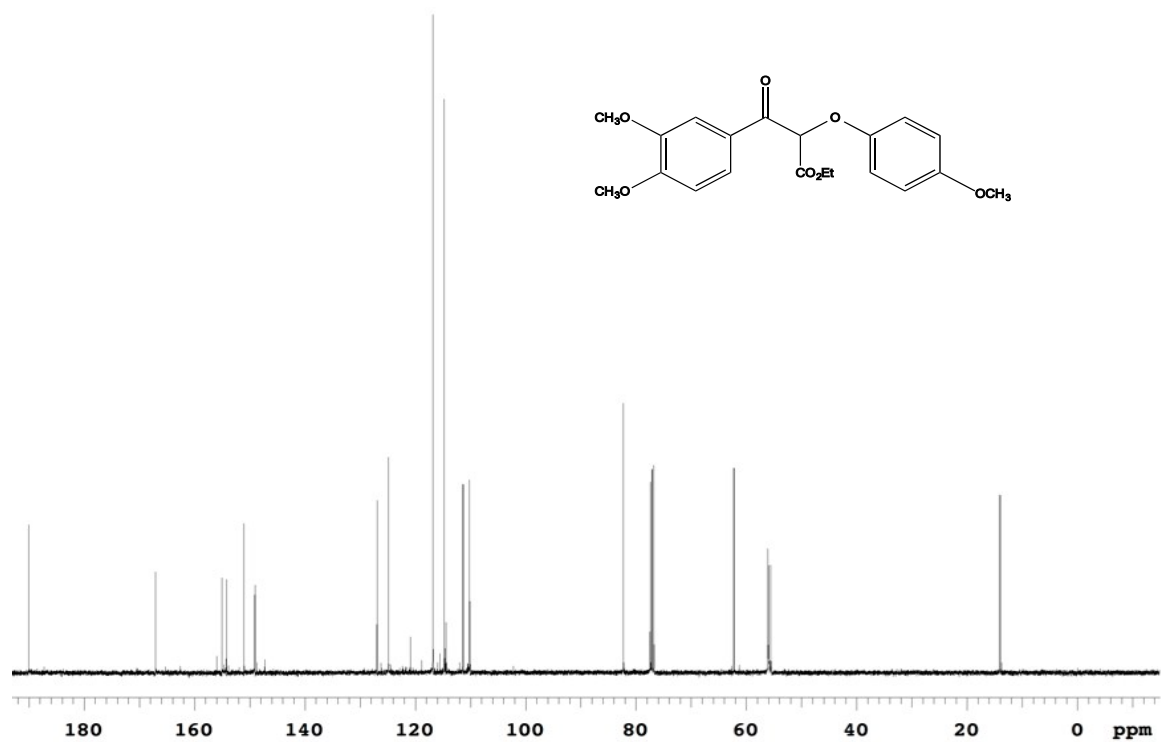

# $^1\text{H}$ NMR and $^{13}\text{C}$ NMR spectra of 9

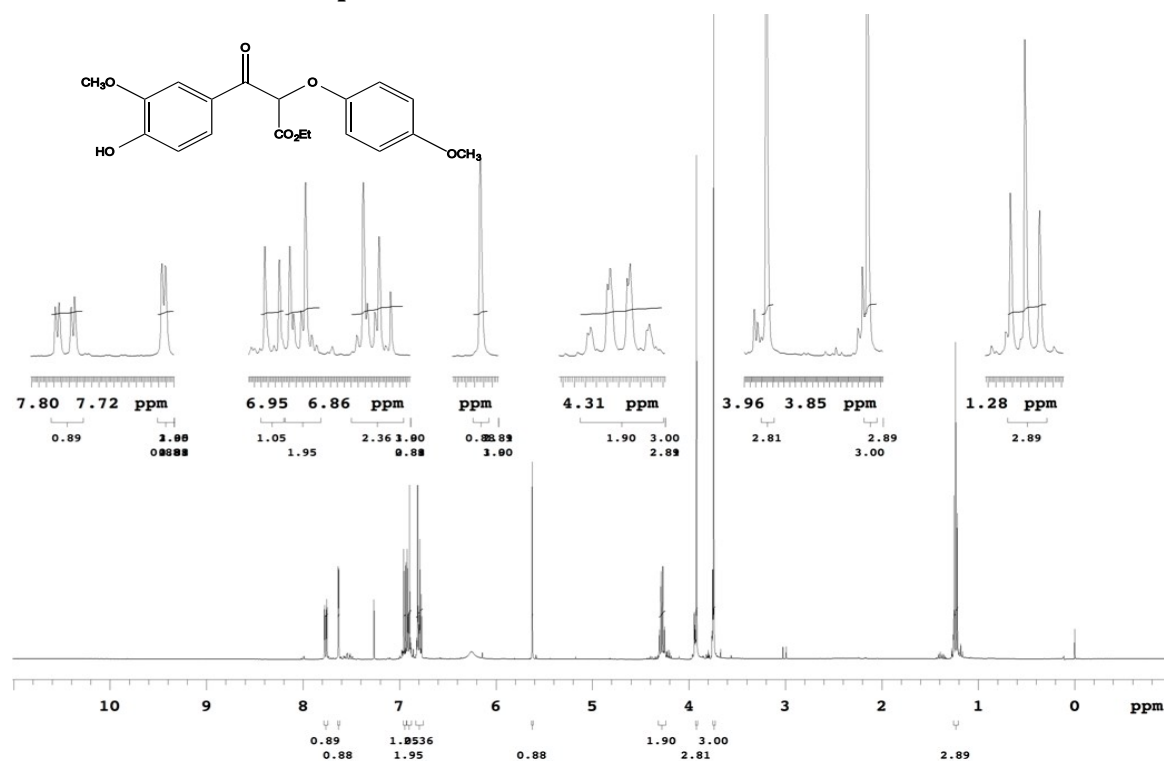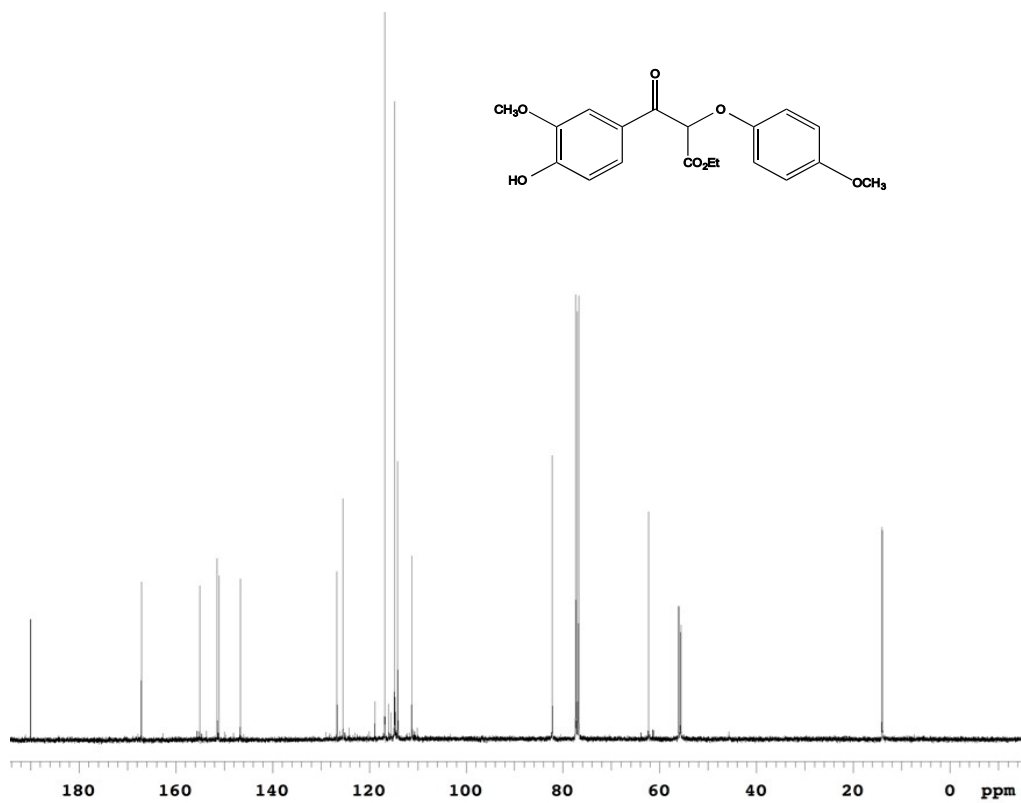



# $^1\text{H}$ NMR and $^{13}\text{C}$ NMR spectra of 10

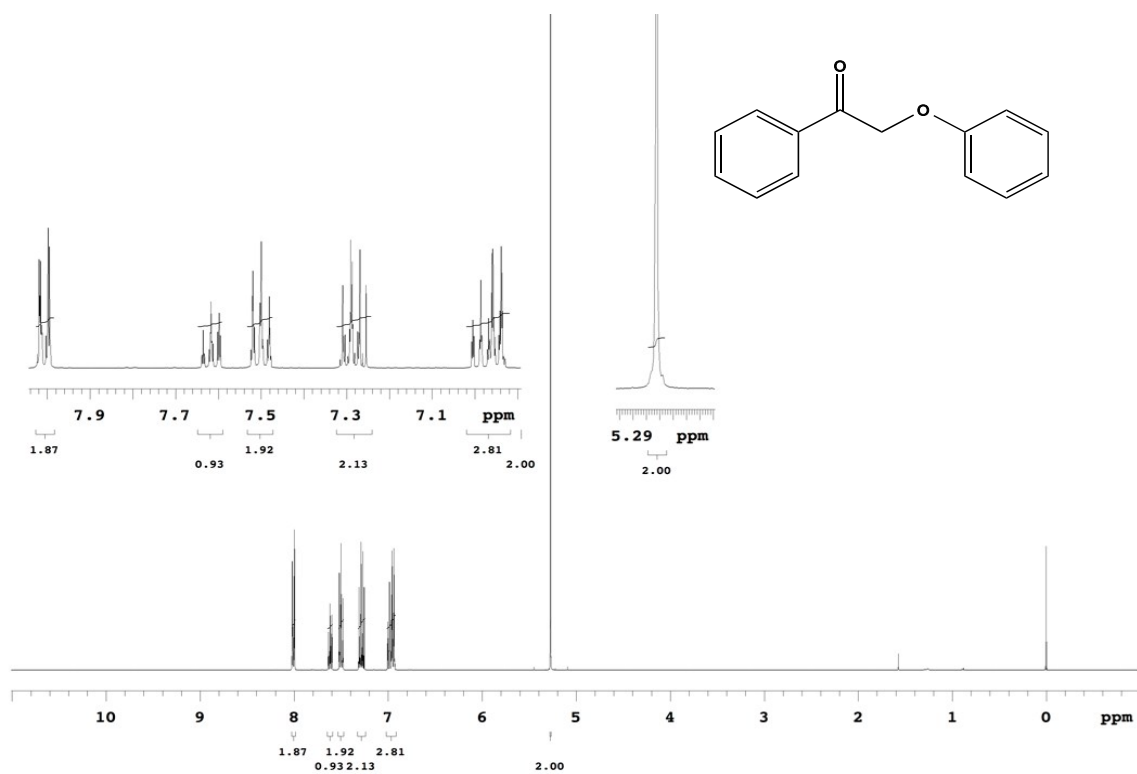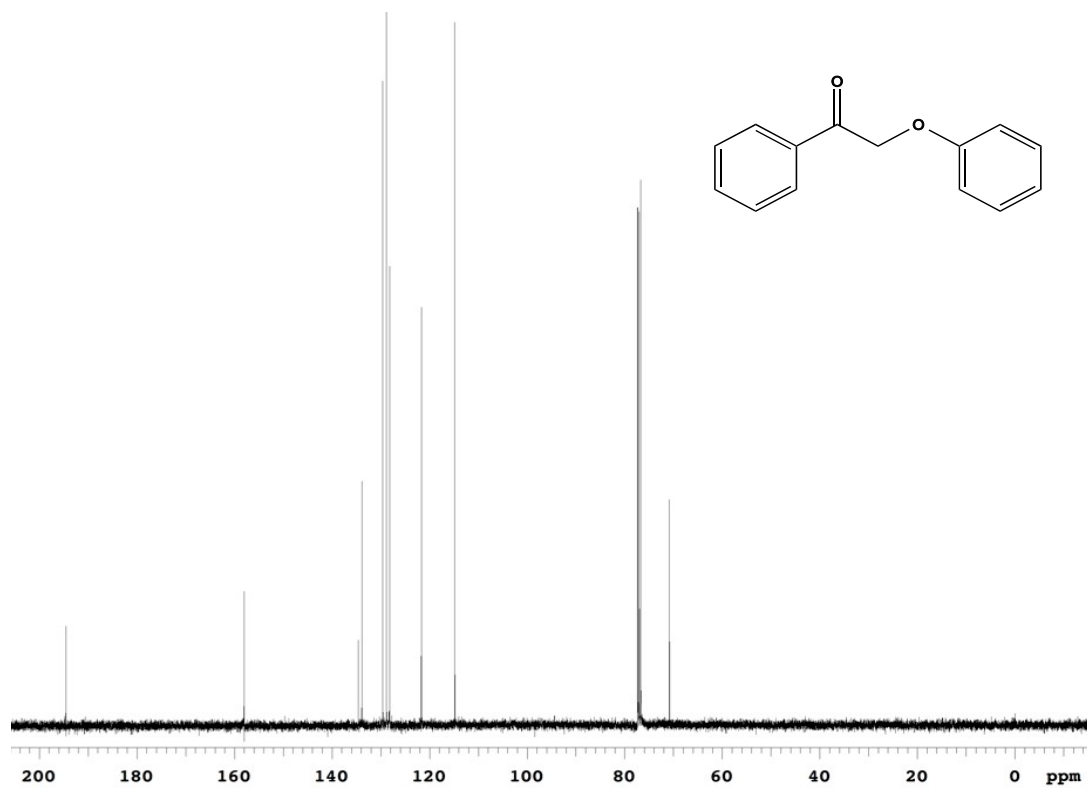

# <sup>1</sup>H NMR and <sup>13</sup>C NMR spectra of 11

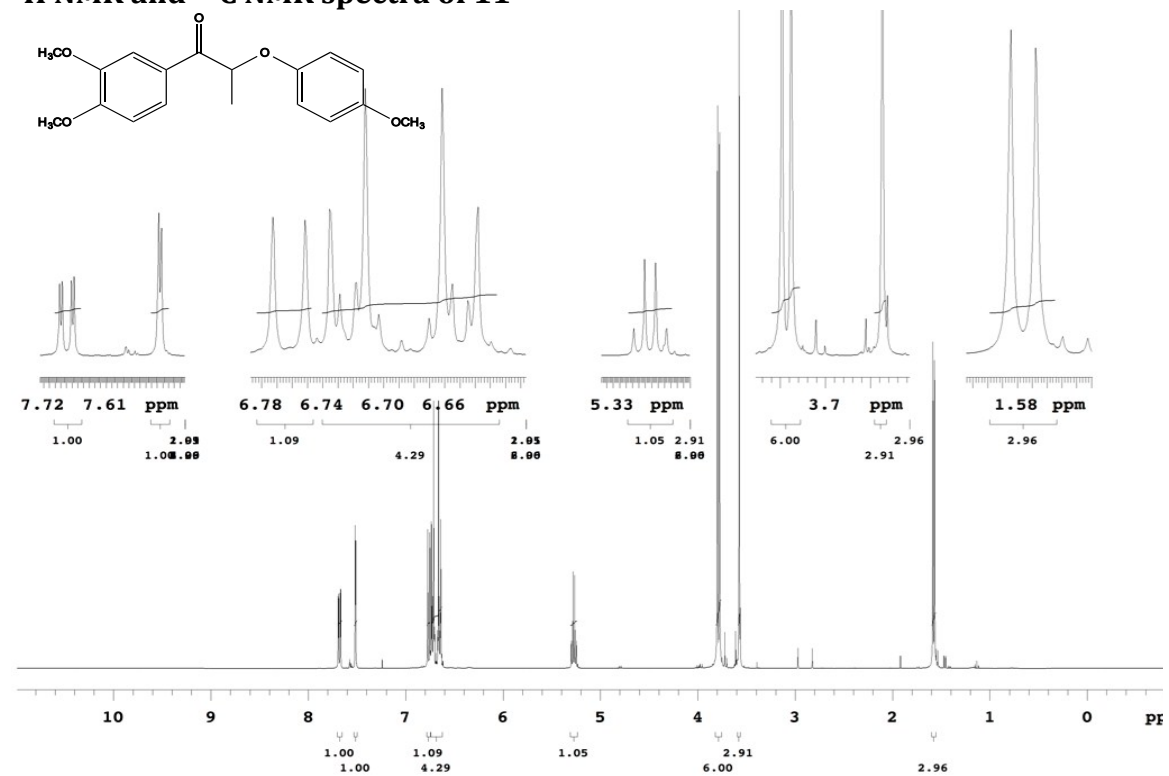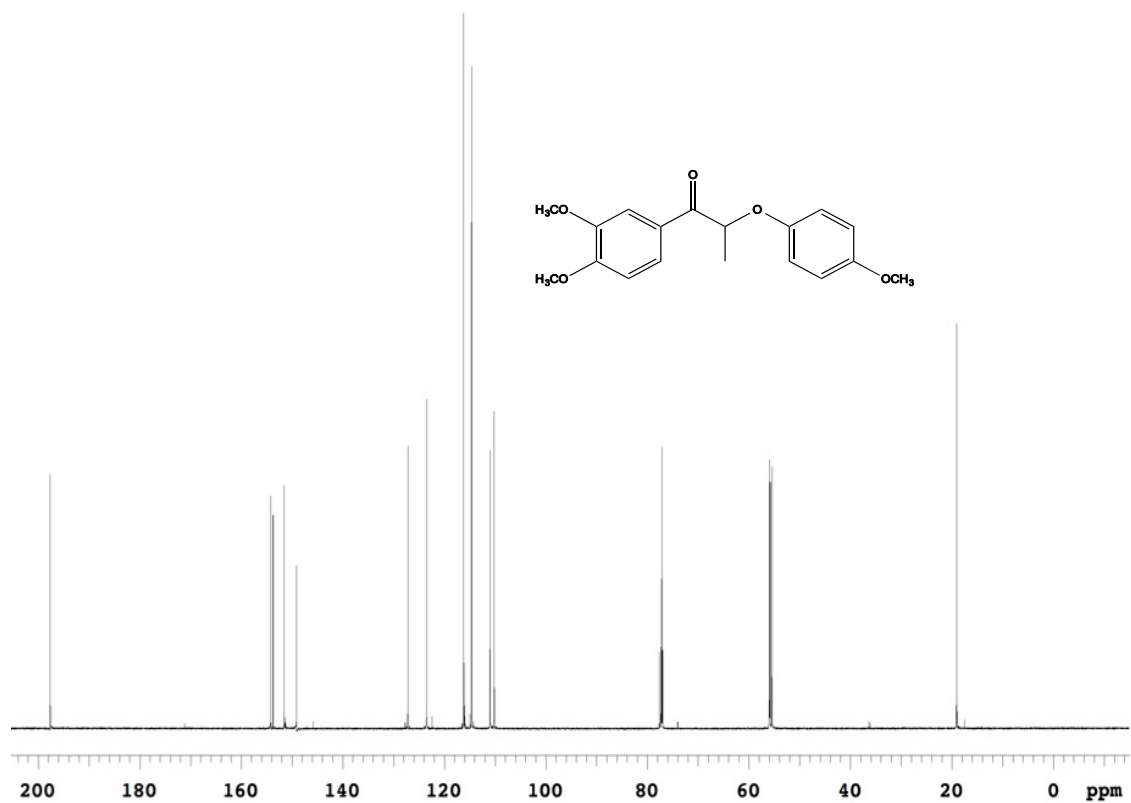

# $^1\text{H}$ NMR and $^{13}\text{C}$ NMR spectra of 12

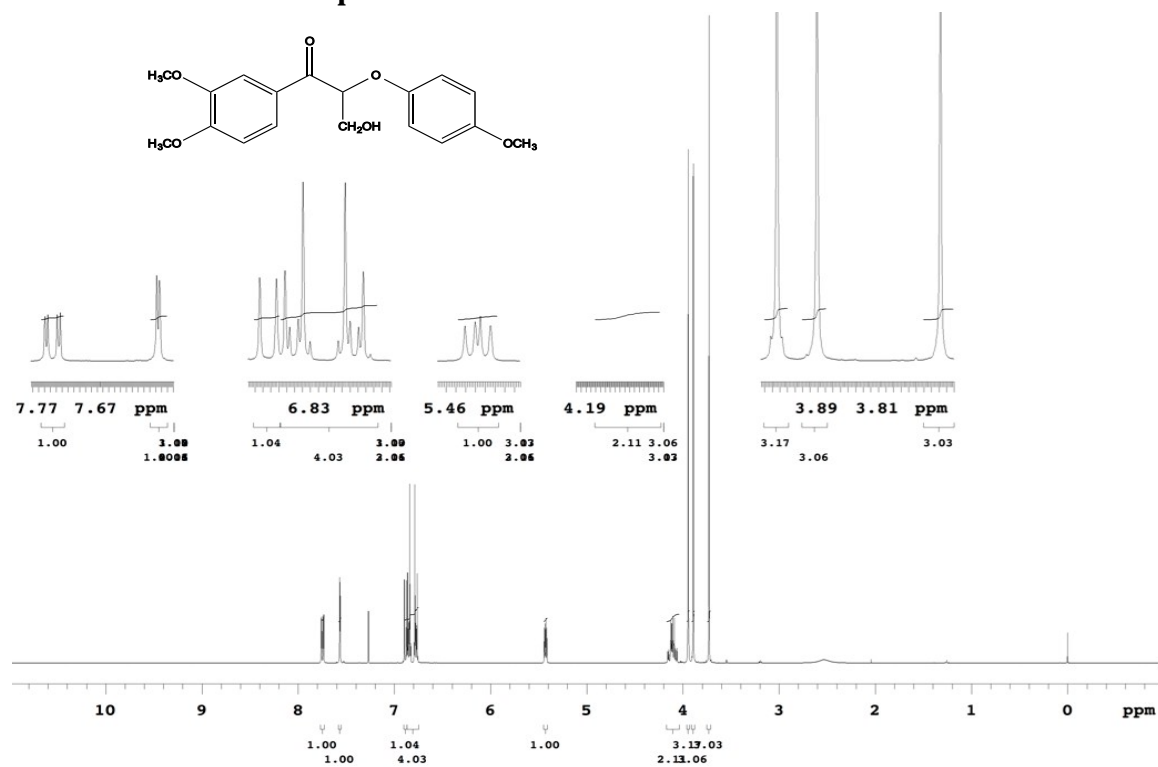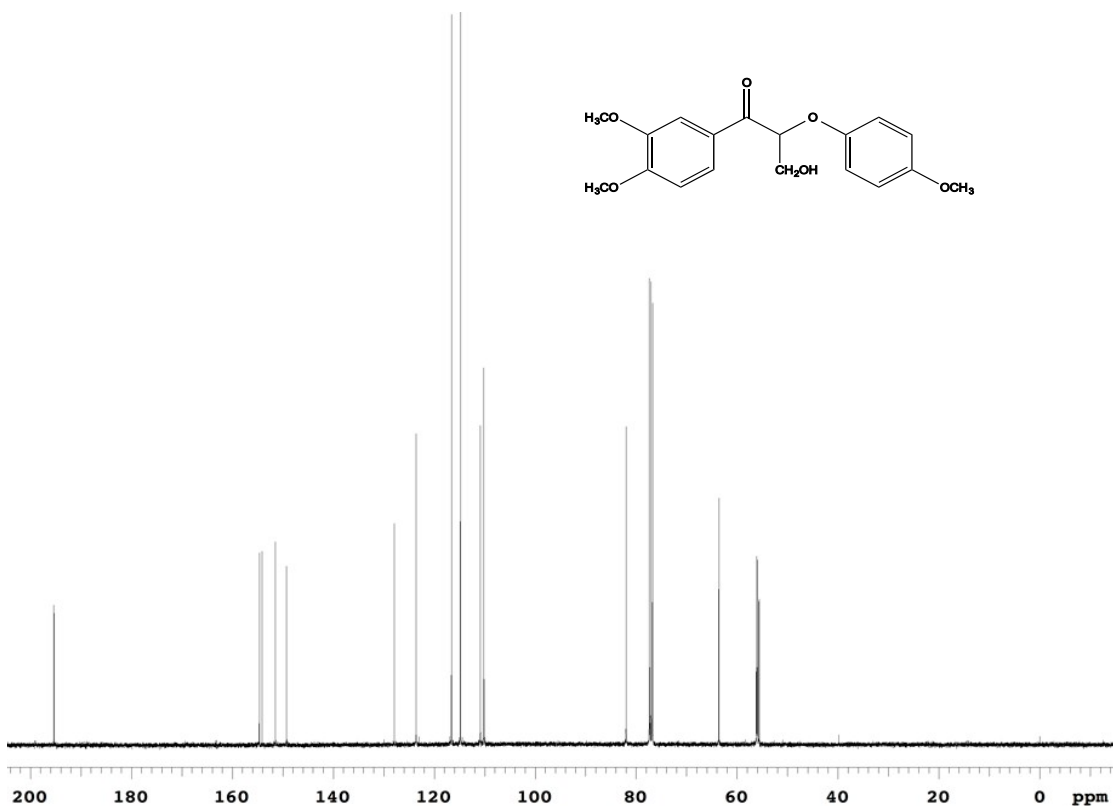

# $^1\text{H}$ NMR and $^{13}\text{C}$ NMR spectra of 21

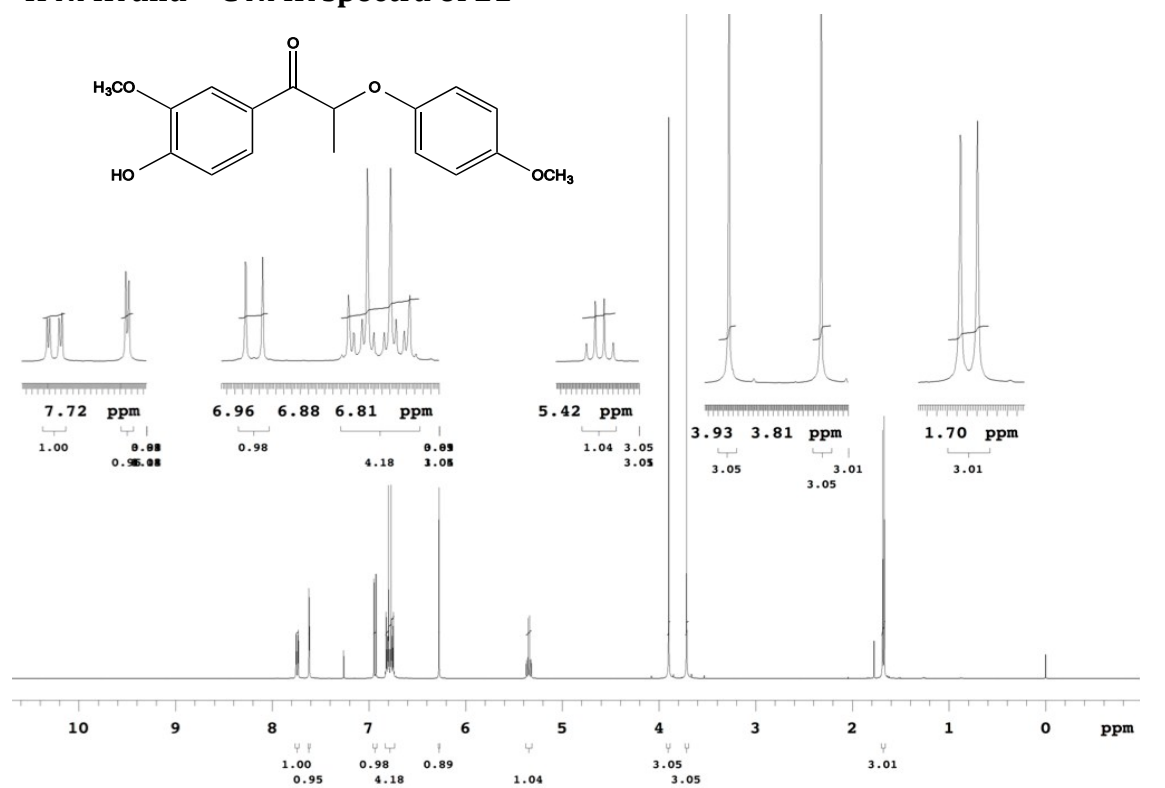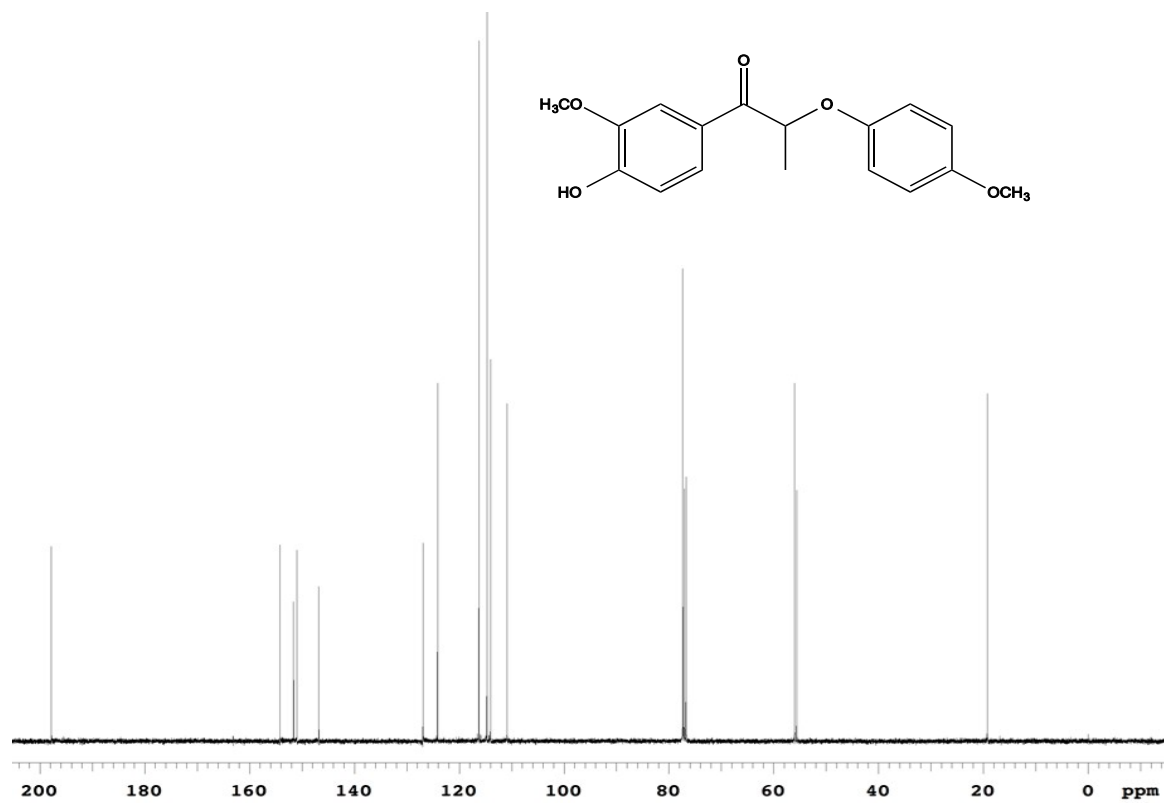

# $^1\text{H}$ NMR and $^{13}\text{C}$ NMR spectra of 22

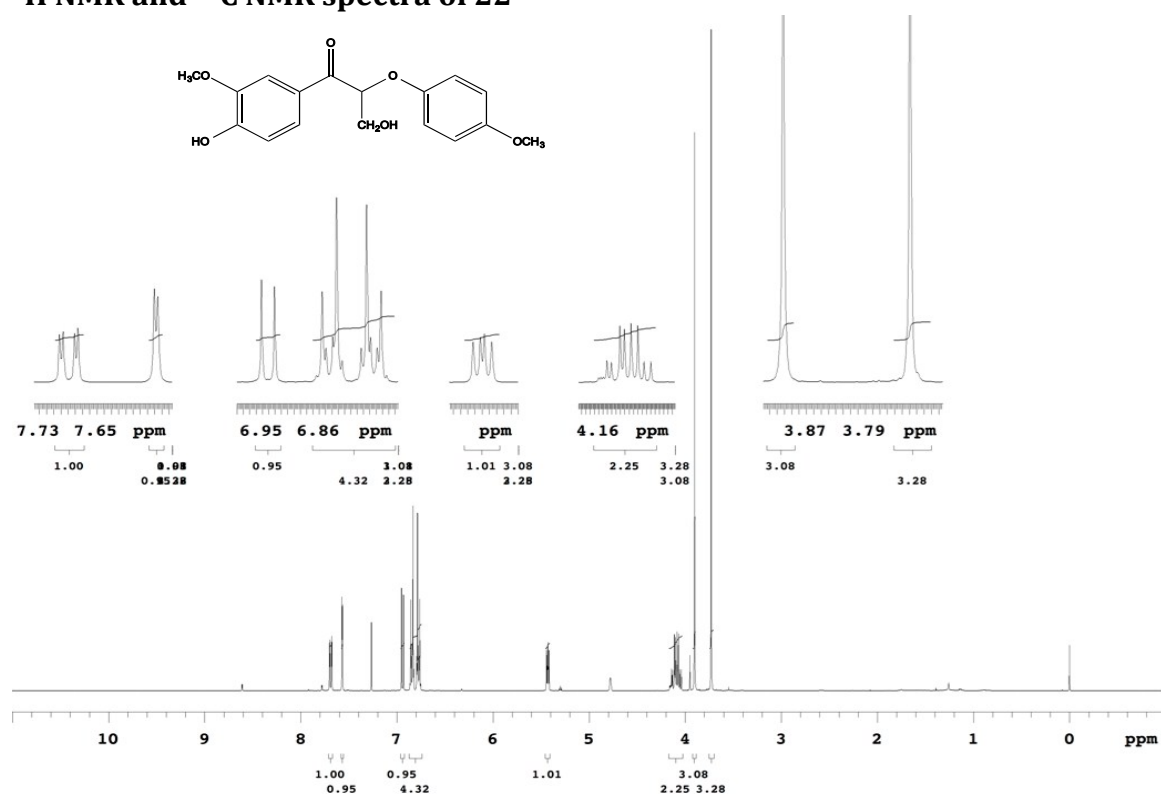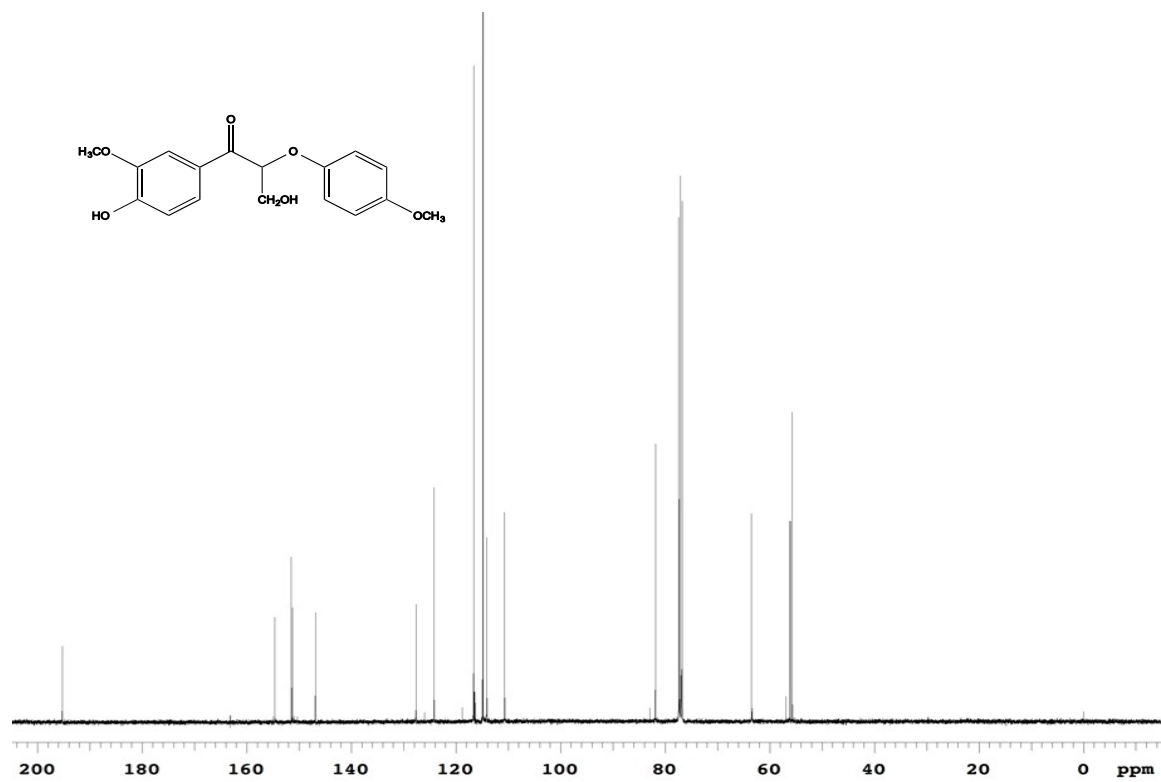

**$^1\text{H}$  NMR spectrum of Kraft Lignin**

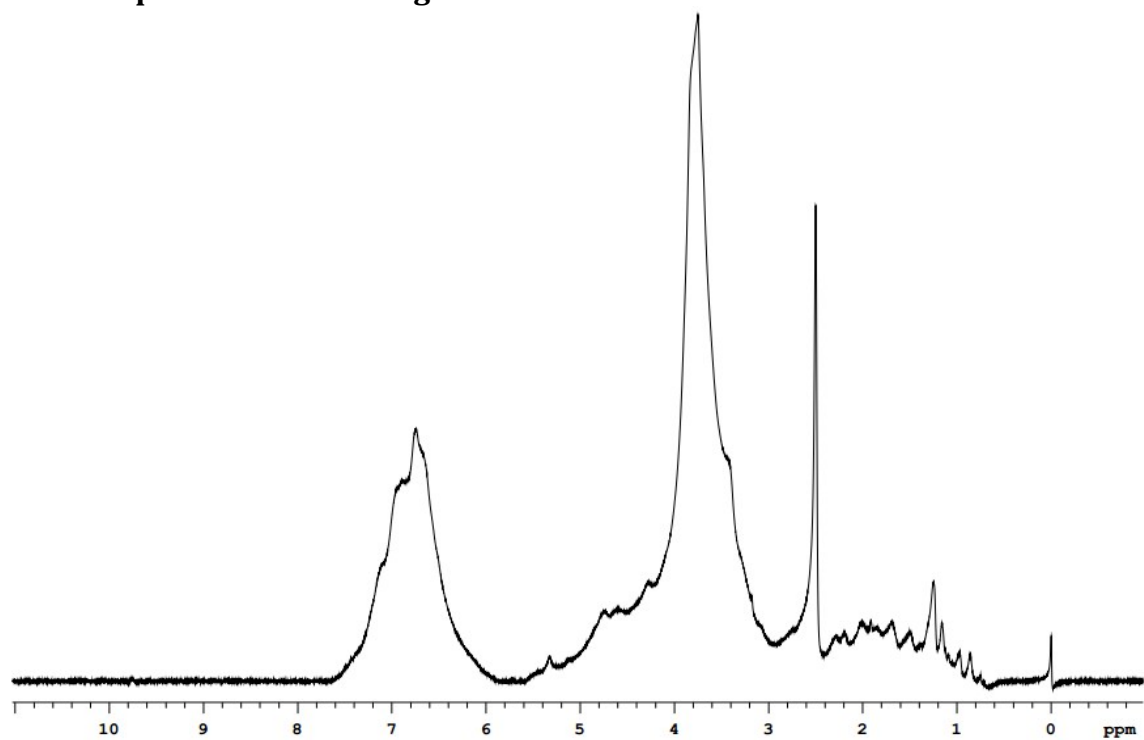

**$^1\text{H}$  NMR spectrum of Kraft lignin post-oxidation in MeCN**

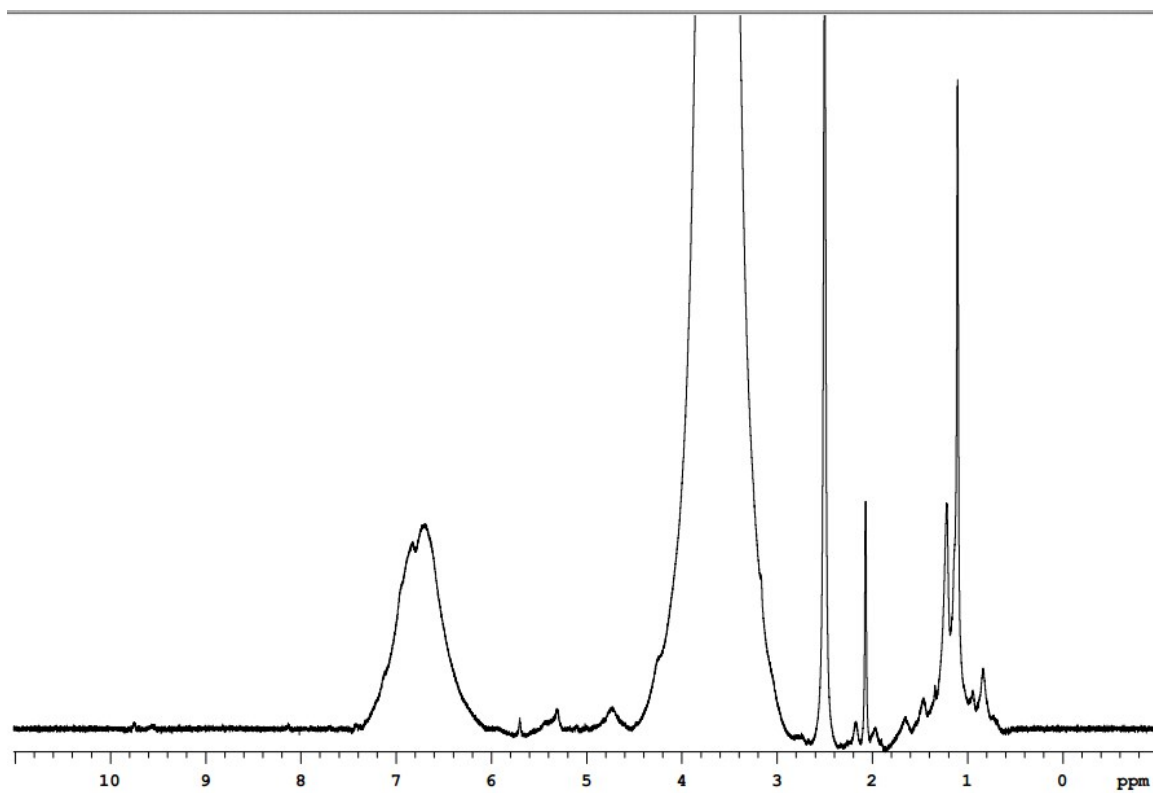

**$^1\text{H}$  NMR spectrum of Kraft lignin post-oxidation in [C4C1im]Cl**

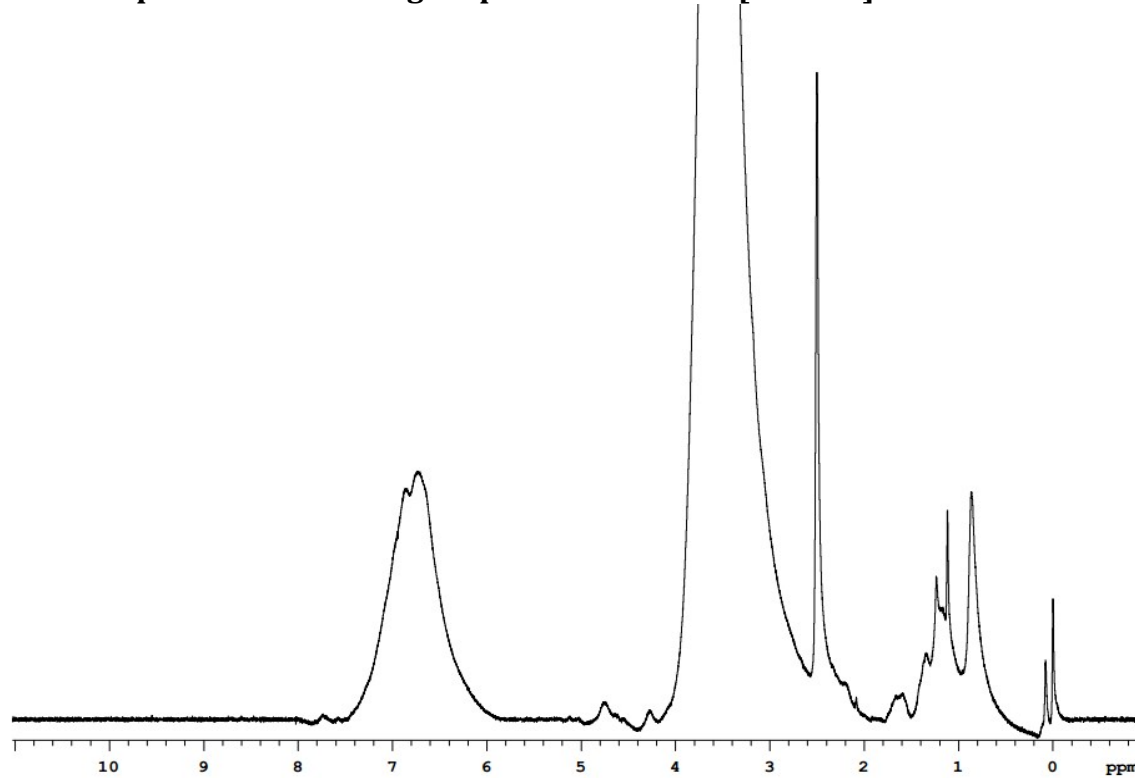

**$^1\text{H}$  NMR spectrum of Kraft lignin post-oxidation in [P4444]Cl**

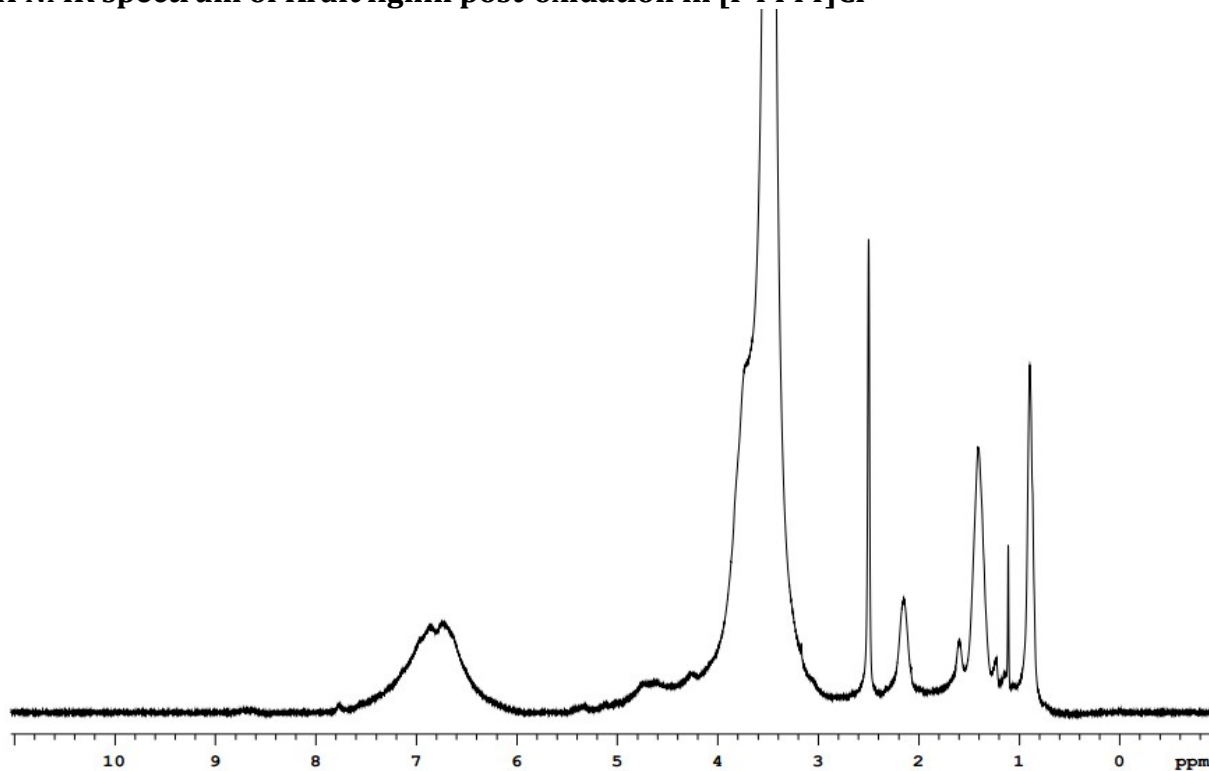

## KBr-FTIR spectrum of Kraft lignin

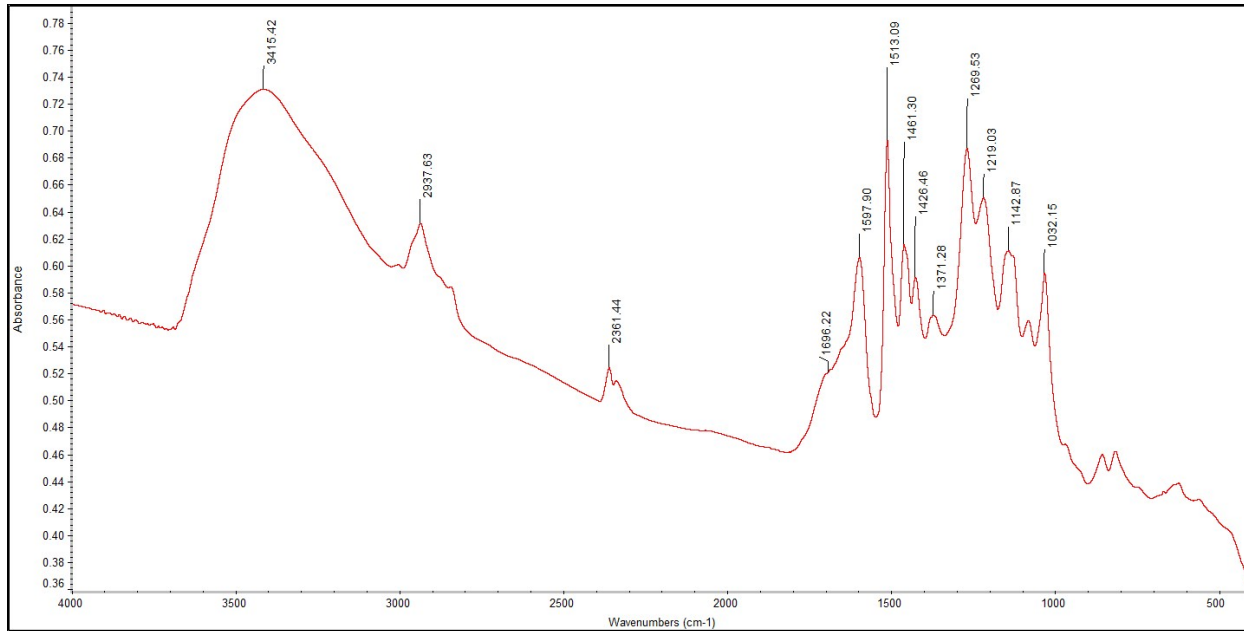

## KBr-FTIR spectrum of Kraft lignin post-oxidation in MeCN

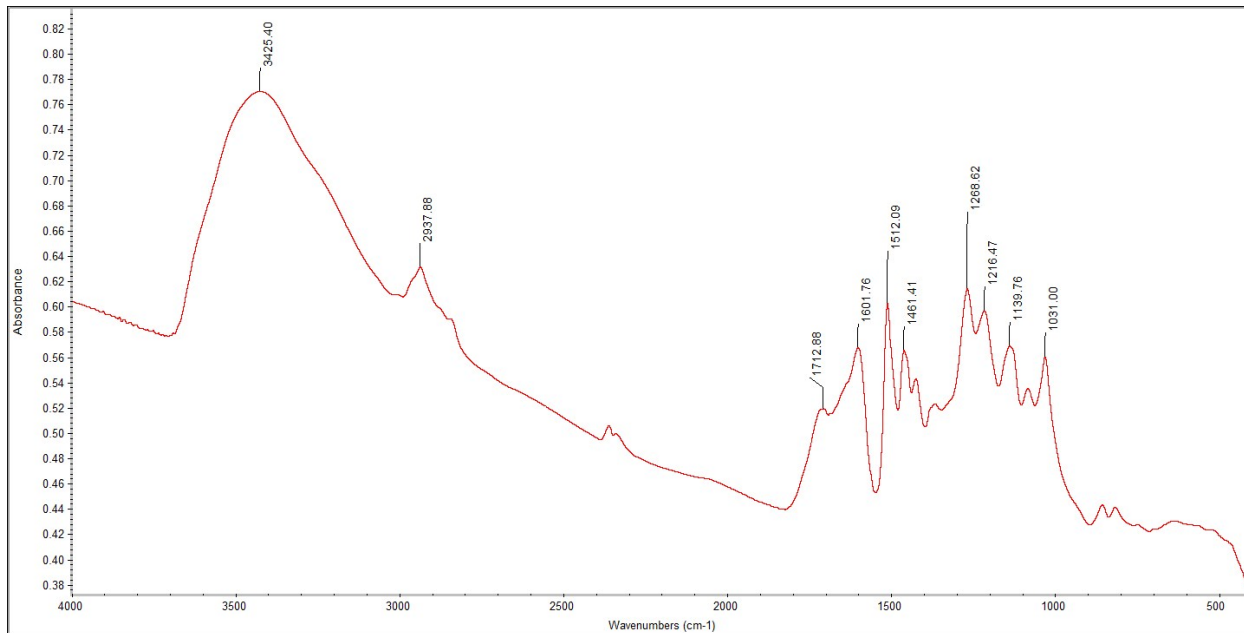



### KBr-FTIR spectrum of Kraft lignin post-oxidation in [C4C1im]Cl

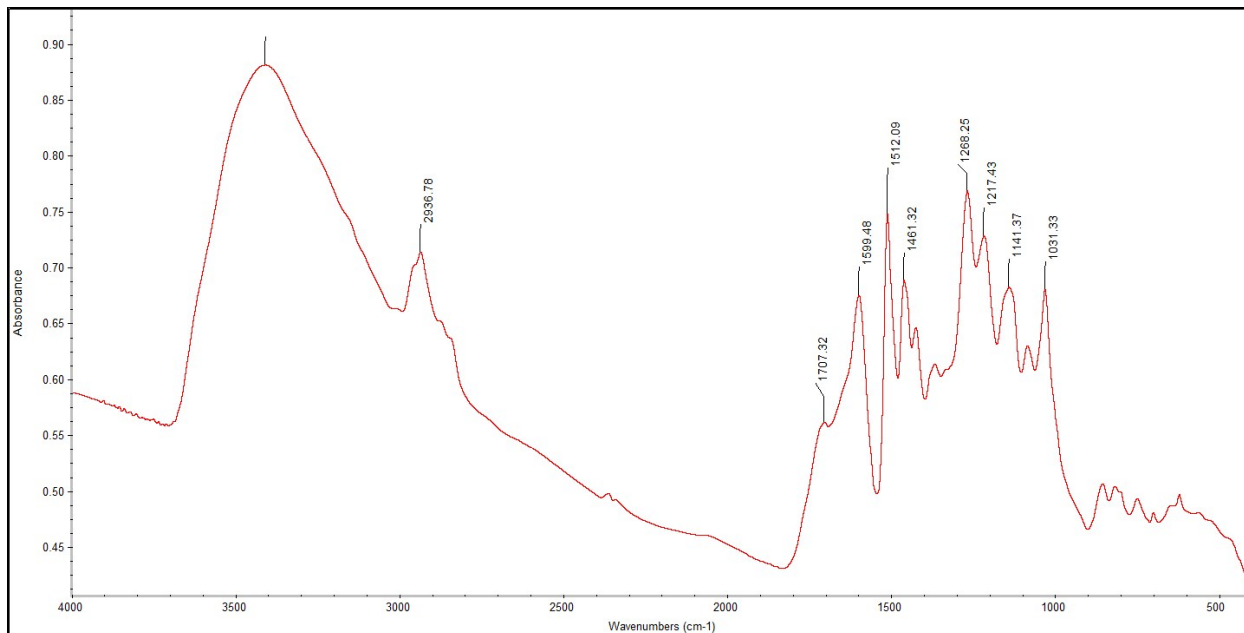

### KBr-FTIR spectrum of Kraft lignin post-oxidation in [P4444]Cl

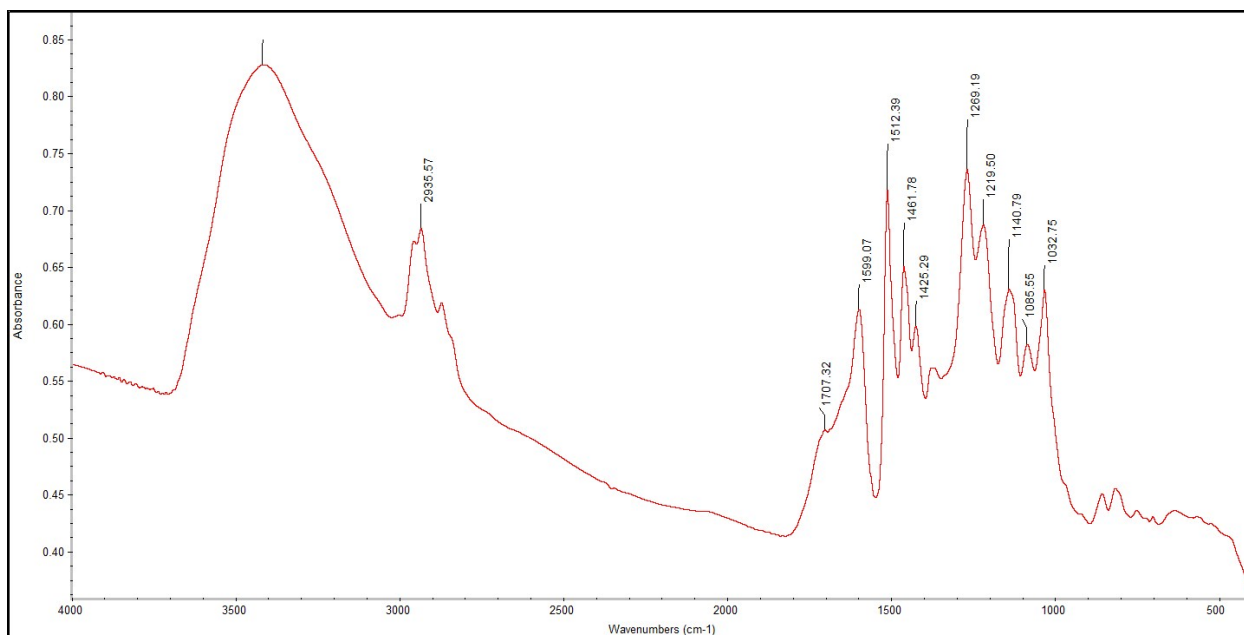

## KBr-FTIR superimposed spectra of Kraft lignin before and after oxidation

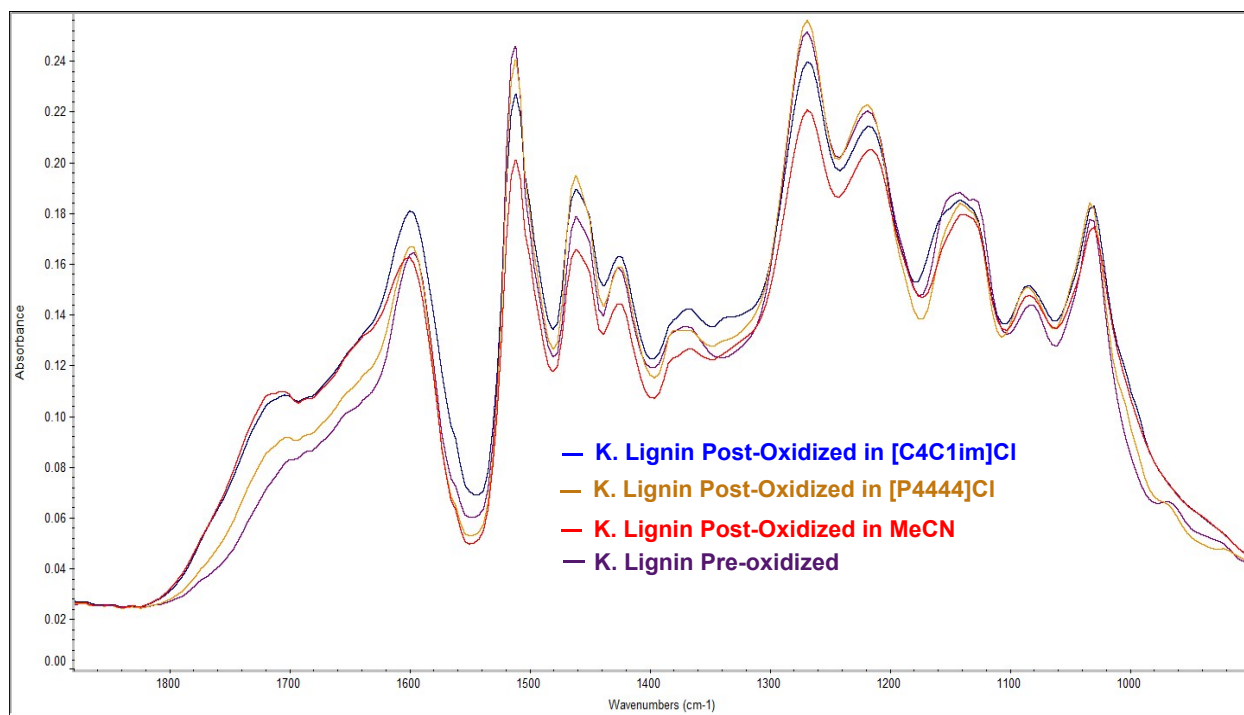

Supplement: c6ra18806k1.pdf [file c6ra18806k1.pdf]
